# Supplementary material for: International evidence-based recommendations on ultrasound-guided vascular access
Source: Springer Nature journal article supplement (doi:10.1007/s00134-012-2597-x), 2012-05-21
Supplement: MOESM1 [file 134_2012_2597_MOESM1_ESM.doc]

**APPENDIX I.**

**METHODS of the INTERNATIONAL CONSENSUS CONFERENCE ON ULTRASOUND VASCULAR ACCESS**

*A. Panel selection*

Experts in ultrasound-guided cannulation were identified based on a minimum of two peer-reviewed articles related to this topic during the past 10 years, taking into consideration the proportionality as determined by a MEDLINE literature search from 1985 to October 2010. Consideration was also given to including members who had experience with evidence-based methodology and/or guideline development.

*B. Literature search strategy*

The literature search was performed in 2 ways. The first method entailed a systematic search by multiple panel experts to avoid selection bias. The medical subject headings included ‘ultrasound’, ‘central venous access’, ‘arterial cannulation’, ‘vascular access’, peripherally inserted central catheter (PICC)’, ‘complications’, and ‘training’. A professional medical librarian based on selected articles from the expert panel supplemented this first search with a hand search. The second method entailed a systematic search of English language articles from 1985 to 2010 by an epidemiologist assisted by the librarian. The two bibliographies were then compared for thoroughness and consistency.

*C. Literature evaluation strategy*

The GRADE method utilised two phases in the development of these evidence-based recommendations. This methodology has been previously detailed in the published literature. There are 15 factors that are typically considered in the GRADE process and these are illustrated in Table 1.

a. First Phase

The level of evidence quality was scored according to 9 factors summarised in Section B of Table 1. The final classification of evidence quality was divided into 3 levels as summarised in Table 2.

b. Second Phase

The transformation of evidence into a recommendation was a function of the panel evaluation of the 5 factors summarised in Section C of Table 1. The GRADE system has not standardised this decision-making process of the expert panel. In an effort to standardise this evidence processing, the methodology committee of this working group selected the Rand Appropriateness Method (RAM). Details of the RAM have been previously published. The combined GRADE-RAND methodology is briefly described in the next section.

*D. Expert Panel Activities*

The expert panel met in Amsterdam (World Conference on Vascular Access, June 15, 2010) and Rome (WINFOCUS World Conference-GAVeCeLT Meeting, October 8, 2010). The experts formulated draft recommendations before each conference to serve as a foundation for subsequent discussion and evaluation. The expert panel was updated through short presentations about the literature search results and subsequent interpretation for drafting of the proposed recommendations. After a single round of face-to-face debating, anonymous voting rounds were conducted, followed subsequently by internet-based voting rounds. The voting process required expert judgment utilising GRADE factors such as outcome importance and evidence-to-recommendation transformers summarised in Table 1 (Section C) and Table 3. The algorithm in Figure 1 depicts the final rendering of disagreement/agreement graded by the degrees of agreement. This process provided a structured and validated method for expert panel activities. In addition, it standardised statistical methodology for determining the degree of agreement to serve as a foundation for deciding about the recommendation grade (weak versus strong).

REFERENCES

1. Elbarbary M, Melniker LA, Volpicelli G (2010) Development of evidence-based clinical recommendations and consensus statements in critical ultrasound field: why and how? Crit Ultrasound J; 2: 93-95

2.http://www.nice.org.uk/aboutnice/howwework/developingniceclinicalguidelines/clinicalguidelinedevelopmentmethods/GuidelinesManual2009.jsp. Last accessed 26th of October 2011.

3. Brouwers MC, Kho ME, Browman GP (2010) AGREE Next Steps Consortium. AGREE II: advancing guideline development, reporting and evaluation in health care. CMAJ ;182:E839-42. Epub 2010 Jul 5

4. http://www.agreetrust.org/resource-centre/agree-ii/. Last accessed on 26h of October 2011

5. Pasterski V, Prentice P, Hughes I (2010) Impact of the consensus statement and the new DSD classification system. Best Pract Res Clin Endocrinol Metab ;24:187-95

6. Franklin R, Jacobs J, Krogmann O (2008) Nomenclature for congenital and paediatric cardiac disease: historical perspectives and The International Pediatric and Congenital Cardiac Code. Cardiol Young ;18 Suppl 2:70-80

7. http://www.gradeworkinggroup.org/society/index.htm. Last accessed on 26th October 2011

8. GRADE guidelines: A new series of articles in the Journal of Clinical Epidemiology (2011) Journal of Clinical Epidemiology;64:380-382

9. GRADE guidelines: 1. Introduction—GRADE evidence profiles and summary of findings tables (2011) Journal of Clinical Epidemiology;64:383-394

10. GRADE guidelines: 2. Framing the question and deciding on important outcomes (2011) Journal of Clinical Epidemiology;64:395-400

11. GRADE guidelines: 3. Rating the quality of evidence (2011) Journal of Clinical Epidemiology;64:401-406

12. GRADE guidelines: 4. Rating the quality of evidence—study limitations (risk of bias) (2011) Journal of Clinical Epidemiology;64:407-415

13. GRADE guidelines: 5. Rating the quality of evidence—publication bias (2011) Journal of Clinical Epidemiology;64:1277-1282

14. GRADE guidelines 6. Rating the quality of evidence—imprecision (2011) Journal of Clinical Epidemiology;64:1283-1293

15. GRADE guidelines: 7. Rating the quality of evidence—inconsistency (2011) Journal of Clinical Epidemiology;64:1294-1302

16. GRADE guidelines: 8. Rating the quality of evidence—indirectness (2011) Journal of Clinical Epidemiology;64;1303-1310

17. GRADE guidelines: 9. Rating up the quality of evidence (2011) Journal of Clinical Epidemiology;64:1311-1316

18. Guyatt G, Rennie D, Meade M (2008) Users' Guides to the Medical Literature: A Manual for Evidence-Based Clinical Practice. McGraw-Hill, New York

19. Guyatt G, Rennie D, Meade M et al. for the GRADE Working Group (2008) Rating quality of evidence and strength of recommendations GRADE: an emerging consensus on rating quality of evidence and strength of recommendations. Br Med J;336:924-926

20. Brozek N et al. for GRADE Working Group (2009) Grading quality of evidence and strength of recommendations in clinical practice guidelines: Part 2 of 3. The GRADE approach to grading quality of evidence about diagnostic tests and strategies. Allergy;64:1109-16

21. http://www.rand.org/health/surveys_tools/appropriateness.html. Last accessed on 26th October 2011

22. Fitch K et al (2001) The RAND/UCLA Appropriateness Method User's Manual. By RAND Corporation, Arlington, VA22202-5050

23. González N et al (2009) Review of the utilization of the RAND appropriateness method in the biomedical literature (1999-2004), Gac Sanit;23:232-7X

24. College of Chest Physicians Delphi Consensus Statement (2001) Chest;119

25. Elbarbary M et al.(2010) Minimizing panel’s bias during Guideline development process by combination of GRADE with Rand Appropriateness Method. Unpublished data- personal communication with corresponding author

Table 1- The 15 GRADE factors

| **Section A.**  **factor 1**  **Outcome factor** | **Critical** | **Important** | **Less Important** | **Not important** |
| --- | --- | --- | --- | --- |
| **SectionB.**  **Factors 2-10**  **The 9 GRADE quality factors** | **study design Quality starting factor** | **Quality of evidence** | **The 5 downgraders**  Quality is lowered if $ | **The 3 Upgraders**  Quality is raised if $ |
| **Randomized trials ** | **High**  4 | ***Limitations of design***  -1 Serious  -2 Very serious  ***Inconsistency***  -1 Serious  -2 Very serious  ***Indirectness***  -1 Serious  -2 Very serious  ***Imprecision***  -1 Serious  -2 Very serious  ***Publication bias***  -1 Likely  -2 Very likely | ***Large effect***  + 1 Large  + 2 Very large  ***Dose response***  + 1 Evidence of a gradient    ***Antagonistic bias***  + 1 All plausible confounding would reduce the effect,  or  + 1 Would suggest a spurious effect when results show no effect |
|  | **Moderate**  3 |
| **Observational studies ** | **Low***  2 |
| **Total Points ** | **Very low***  1 |
| **Section C. Factors 11-15***@*  **The 5 GRADE transformers** | **Overall judgment on outcome(s)** | Critical | Important | Less important |
| **Overall quality of evidence across outcomes** | High | moderate | Low (& very low) |
| **Benefit/cost ratio** | favorable | uncertain | unfavorable |
| **Benefit / harm ratio** | favorable | uncertain | unfavorable |
| **Certainty about similarity in values/preferences** | Highly similar | uncertain | widely variable |

$ 1 = move up or down one point-grade (for example from high to intermediate)

2 = move up or down two points-grades (for example from high to low)

RCT= 4 points Observational studies = 2 points Low and very low levels can be combined in one level

Table 2: Levels of quality of evidence

| **Level*** | **#Points** | **Quality** | **Interpretation** |
| --- | --- | --- | --- |
| A | > 4 | **High** | Further research is very unlikely to change our confidence in the estimate of effect or accuracy. |
| B | = 3 | **Moderate** | Further research is likely to have an important impact on our confidence in the estimate of effect or accuracy and may change the estimate. |
| C | < 2 | **Low*** | Further research is very likely to have an important impact on our confidence in the estimate of effect or accuracy and is likely to change the estimate. ....................OR Any estimate of effect or accuracy is very uncertain(very low) |

*Level C = can be divided into low (points =2) and very low (points=1 or less)

# Points are calculated based on the 9 GRADE quality factors (Table 1 section B)

Table 3: E-to-R table (Evidence-to-Recommendation table)

**Draft Recommendation**

|  |
| --- |

***Does the draft recommendation above address strategy that has more than one outcome*** * YES  NO****†***

| **The 5 Transforming Factors** | **Decision** | **Explanation** |
| --- | --- | --- |
| **1. Multiple Outcomes Importance**  Outcome 1_________________ its rank_____  Outcome 2_________________ its rank_____  Outcome 3_________________ its rank_____  The more important the outcome, the more likely is a strong recommendation | **The most important outcome** is  _____________ | Rank: 9 =extremely important (critical) 1=extremely unimportant with 3 regions 7-9 important, 4-6 less important and 1-3 unimportant  **Your notes:** |
| **2. Quality of evidence***  Outcome 1________its evidence quality_____  Outcome 2________its evidence quality_____  Outcome 3________its evidence quality_____  The higher the quality of evidence, the more likely is a strong recommendation$ | **The overall quality across outcomes**   High   moderate   low | If multiple outcomes, overall quality will follow that of the most important outcome (e.g. of the critical). If multiple equal outcomes (e.g. all have equal importance), then follow the least quality  **Your notes:** |
| **3. Benefit /Harm ratio**  The larger the difference between the desirable and undesirable consequences and the certainty around that difference, the more likely a strong recommendation. The smaller the net benefit and the lower the certainty for that benefit, the more likely is a conditional/weak recommendation. |  9   8   7   6   5   4   3   2   1 | 9 =extremely favorable 1=extremely unfavorable with 3 regions 7-9 favorable, 4-6 uncertain and 1-3 unfavorable  **Your notes:** |
| **4. Benefit/Cost ratio**  The higher the costs of an intervention and other cost related to the decision – that is, the more resources consumed – the more likely is a conditional/weak recommendation. Are the resources consumed worth the expected benefit? |  9   8   7   6   5   4   3   2   1 | 9 =extremely favorable 1=extremely unfavorable with 3 regions 7-9 favorable, 4-6 uncertain and 1-3 unfavorable,  **Your notes:** |
| **5. Degree of certainty about similarity in values/preferences**  The smaller the variability or the greater the certainty around values and preferences, the more likely is a strong recommendation |  9   8   7   6   5   4   3   2   1 | 9 =extremely certain of similarity 1=extremely certain of variability with 3 regions 7-9 expected similarity, 4-6 uncertain and 1-3 expected wide variability in values and preferences  **Your notes:** |

***†*** If No (i.e., one outcome) then please list in factor 1&2 the previously determined initial ranking of outcome and quality level guided by the Initial quality of evidence that is presented to the panel in the Summary Of Findings (SOF) tables (ideally should be determined by independent methodologist). $Some exceptions may apply

After assessment of the above 5 factors, Please rank your approval (appropriateness) of the above draft recommendation.

Keeping in mind that 9 =totally approve (extremely appropriate) 1= totally disapprove (extremely inappropriate) **With 3 regions**:

Approval (Appropriate) region: 7-9; Uncertain region: 4-6; Disapproval (Inappropriate) region: 1-3.

**My vote for the above draft recommendation is**:

 9  8  7  6  5  4  3  2  1
